# Supplementary material
Source: PubMed Central journal article supplement (PMC2697598)
Supplement: NIHMS5189-supplement-Supplementary_data.pdf [file NIHMS5189-supplement-Supplementary_data.pdf]

## A common *MYBPC3* (cardiac myosin binding protein C) variant associated with cardiomyopathies in South Asia

Perundurai S Dhandapany<sup>1</sup>, Sakthivel Sadayappan<sup>2</sup>, Yali Xue<sup>3</sup>, Gareth T Powell<sup>3</sup>, Deepa Selvi Rani<sup>4</sup>, Prathiba Nallari<sup>5</sup>, Taranjit Singh Rai<sup>6</sup>, Madhu Khullar<sup>6</sup>, Pedro Soares<sup>7</sup>, Ajay Bahl<sup>6</sup>, Jagan Mohan Tharkan<sup>8</sup>, Pradeep Vaideeswar<sup>9</sup>, Andiappan Rathinavel<sup>10</sup>, Calambur Narasimhan<sup>11</sup>, Dharma Rakshak Ayapati<sup>12</sup>, Qasim Ayub<sup>3,13</sup>, S Qasim Mehdi<sup>13,18</sup>, Stephen Oppenheimer<sup>14</sup>, Martin B Richards<sup>7</sup>, Alkes L Price<sup>15</sup>, Nick Patterson<sup>16</sup>, David Reich<sup>16,17</sup>, Lalji Singh<sup>4</sup>, Chris Tyler-Smith<sup>3</sup> & Kumarasamy Thangaraj<sup>4</sup>

<sup>1</sup>Department of Biochemistry, Madurai Kamaraj University, Madurai 625 021, India. <sup>2</sup>Molecular Cardiovascular Biology, Cincinnati Children's Hospital Medical Center, Cincinnati, Ohio 45229, USA. <sup>3</sup>Wellcome Trust Sanger Institute, Hinxton, Cambs, CB10 1SA, UK. <sup>4</sup>Centre for Cellular and Molecular Biology, Hyderabad 500 007, India. <sup>5</sup>Department of Genetics, Osmania University, Hyderabad 500 007, India. <sup>6</sup>Post Graduate Institute of Medical Education and Research, Chandigarh 160 012, India. <sup>7</sup>Faculty of Biological Sciences, Institute of Integrative and Comparative Biology, University of Leeds, Leeds LS2 9JT, UK. <sup>8</sup>Department of Cardiology, Sri Chitra Tirunal Institute of Medical Sciences and Technology, Thiruvananthapuram 695 011, India. <sup>9</sup>Department of Pathology (Cardiovascular & Thoracic Division), Seth GS Medical College and KEM Hospital, Mumbai 400 012, India. <sup>10</sup>Department of Cardio-Thoracic Surgery, Rajaji Government Hospital and Madurai Medical College, Madurai 625020, India. <sup>11</sup>Cardiology Unit, CARE Hospital, Hyderabad 500 001, India. <sup>12</sup>Department of Cardiac Surgery, Nizams Institute of Medical Sciences, Hyderabad 500 082, India. <sup>13</sup>Institute of Biotechnology and Genetic Engineering (KIBGE), University of Karachi, Karachi 75270, Pakistan. <sup>14</sup>Department of Anthropology, University of Oxford, Oxford, OX1 2JD, UK. <sup>15</sup>Harvard School of Public Health, Boston, Massachusetts 02115, USA. <sup>16</sup>Broad Institute of Harvard and Massachusetts Institute of Technology, Cambridge, Massachusetts 02142, USA. <sup>17</sup>Department of Genetics, Harvard Medical School, Boston, Massachusetts 02115, USA. <sup>18</sup>Centre for Human Genetics and Molecular Medicine, Sindh Institute of Urology and Transplantation, Karachi 74200, Pakistan. Correspondence should be addressed to K.T. ([thangs@ccmb.res.in](mailto:thangs@ccmb.res.in)).

## 1. Supplementary Figures

### Supplementary Figure 1

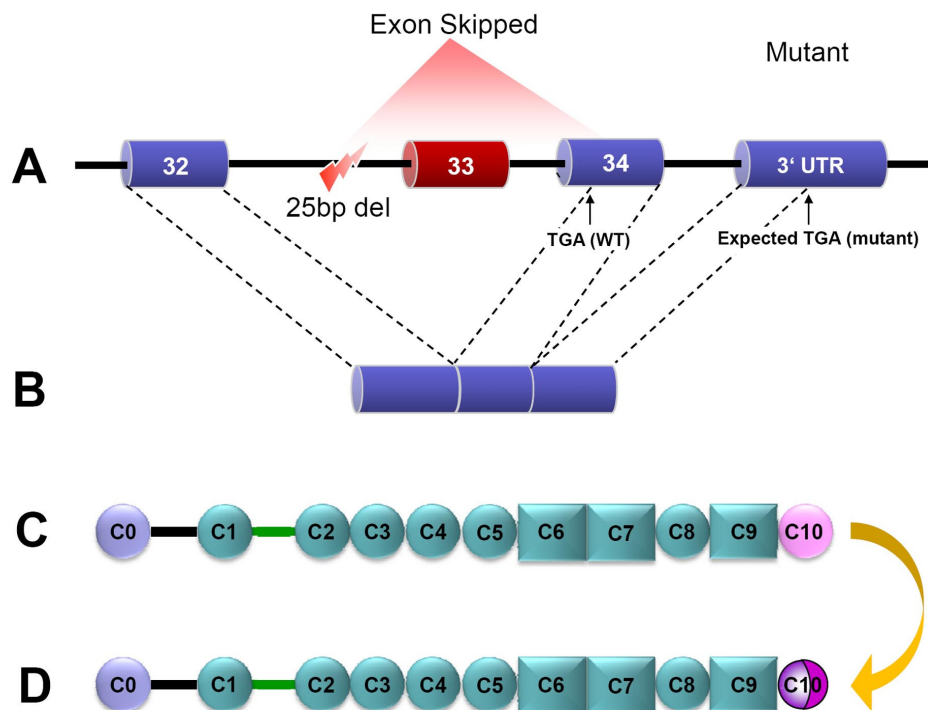

**Supplementary Figure 1.** Schematic representation of the consequences of the *MYBPC3* deletion

(A) Exon skipping. The deletion of 25bp in intron 32 at the branch point causes skipping of exon 33.

(B) The loss of exon 33 is associated with a shift in the open reading frame and an unscheduled translational stop in the 3' non-translated sequence

(C) Wild type MyBP-C protein

(D) The consequence of MyBP-C exon 33 skipping (due to the 25-bp deletion) is the substitution in domain C10 of 62 WT amino acids with a different 55 amino acids

## Supplementary Figure 2

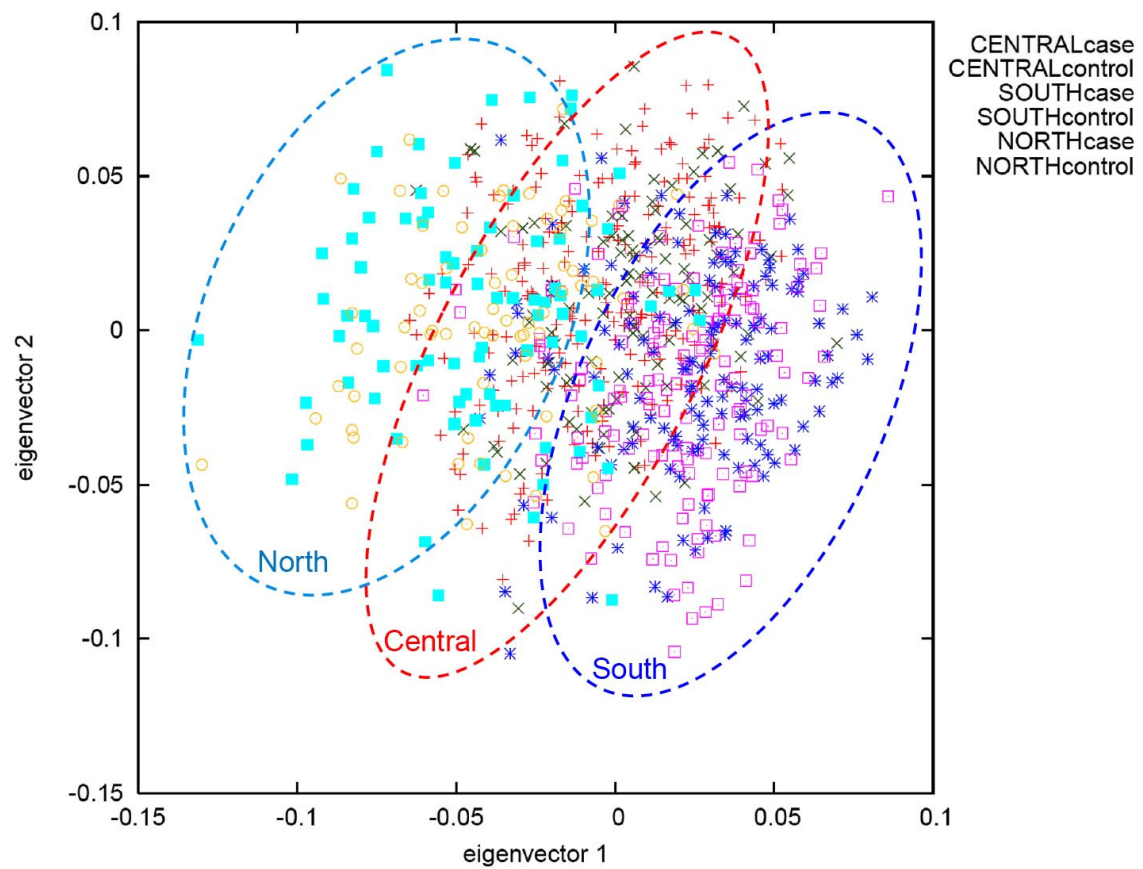

**Supplementary Figure 2.** Principal components analysis of South, Central and North Indian samples based on a panel of 50 ancestry-informative SNP markers (AIMs).

## Supplementary Figure 3

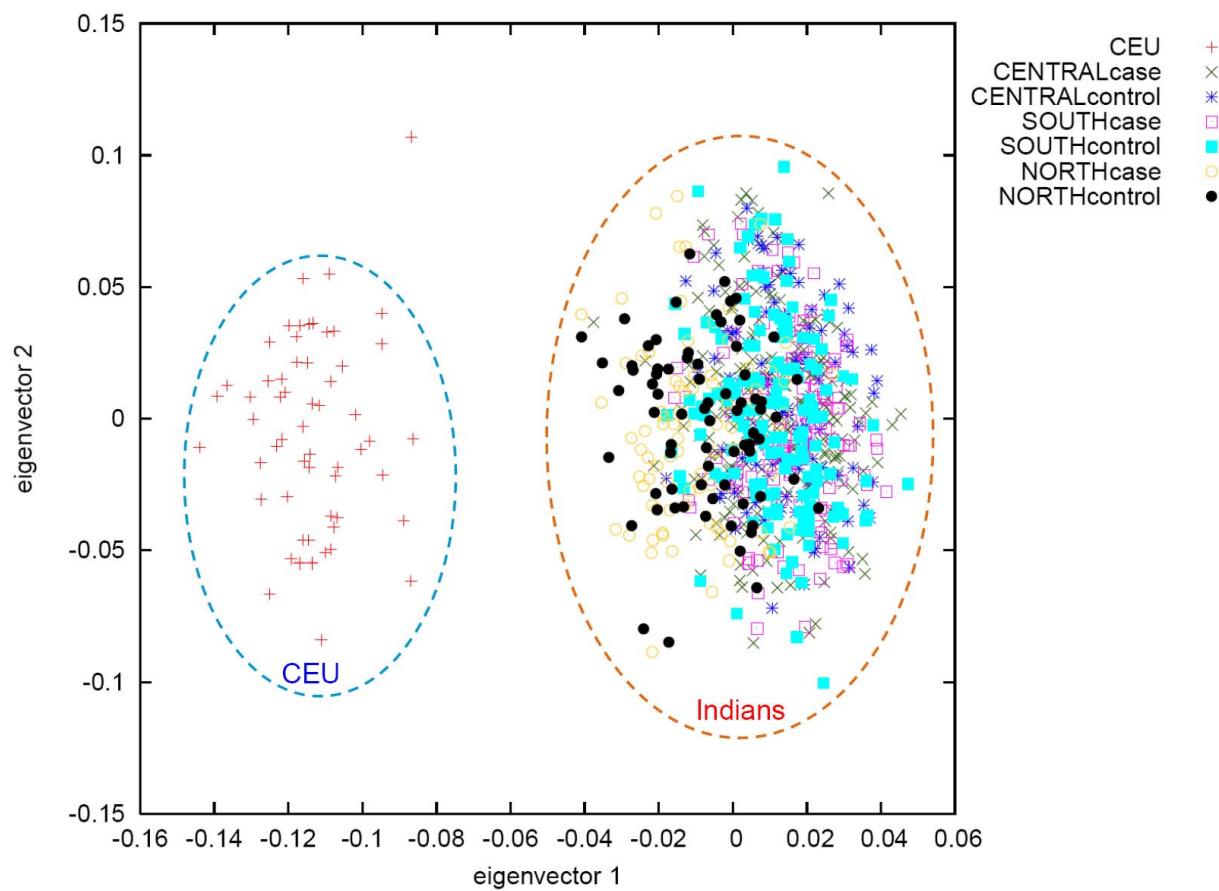

**Supplementary Figure 3.** Positions of South, Central and North Indian samples along the Europe-related genetic axis. We plot the top two eigenvectors of a principal components analysis of South, Central and North Indian samples together with CEU samples from HapMap. Only the first eigenvector, representing the Europe-related axis, is of interest. Note the North Indian samples were significantly closer to CEU on this axis than Central and South samples, confirming that the 50 AIMs are sufficient for detecting whether or not ancestry differences along this axis are present (Anova p-value < 1e-12)

## Supplementary Figure 4A

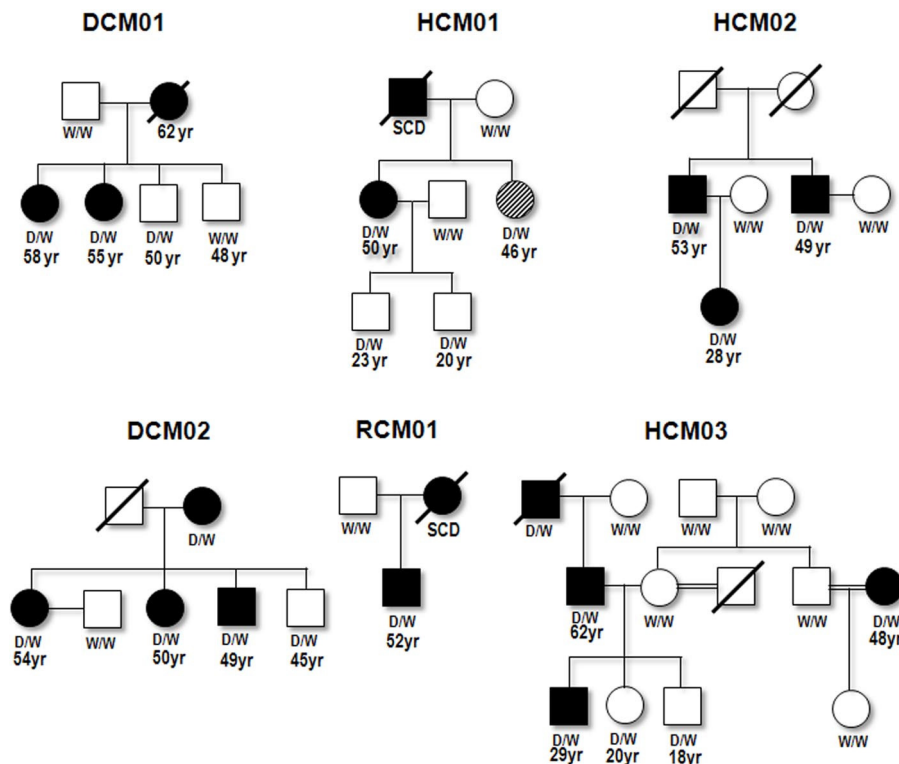

**Supplementary Figure 4A.** Pedigrees of representative families with the 25 bp deletion. Squares indicate men, circles women, solid symbols affected family members, open symbols unaffected family members, and hatched symbols family members whose status is unknown; symbols with a slash indicate deceased individuals. The genetic status, when known, is shown below each individual (D indicates that the allele carries the 25 bp deletion, W that the allele does not carry 25 bp deletion, and D/W that the subject is heterozygous). SCD denotes sudden death from cardiac causes. HCM, DCM and RCM represent Hypertrophic, Dilated and Restrictive Cardiomyopathies, respectively.

## Supplementary Figure 4B

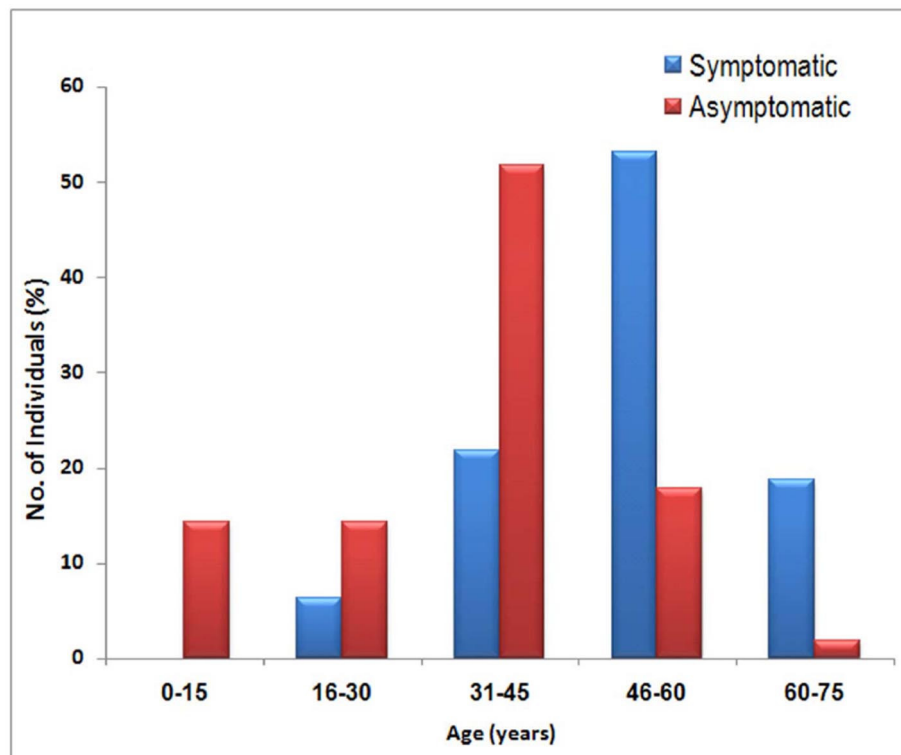

**Supplementary Figure 4B.** Age-dependent penetrance of the 25bp deletion among the family members of cardiomyopathy cases.

A total of eighty-eight deletion carriers (symptomatic and asymptomatic) among the 120 family members were compared among themselves for the five age classes (0-15, 16-30, 31-45, 46-60, 60-75). The selection criteria for symptomatic and asymptomatic carriers are outlined in Supplementary Table 3.

## Supplementary Figure 4C

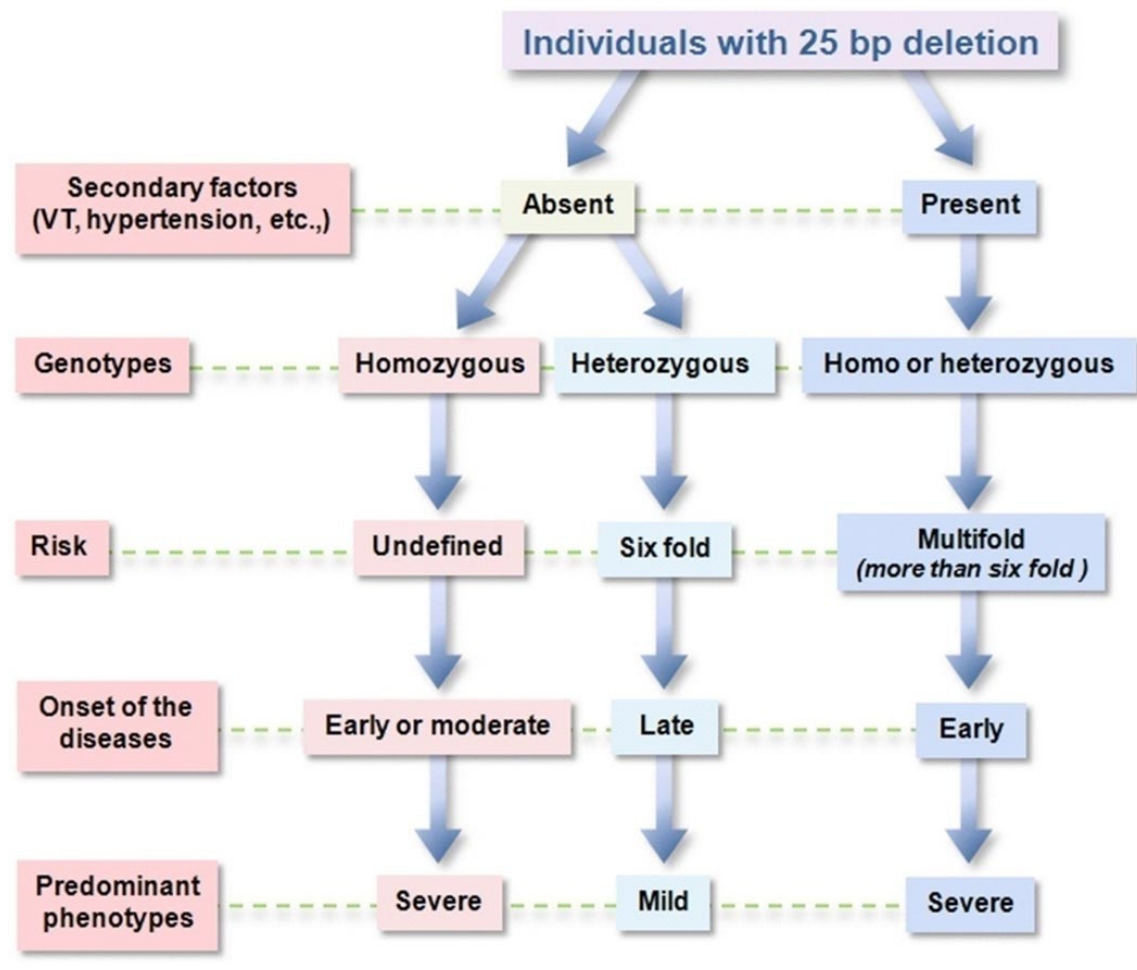

**Supplementary Figure 4C.** Schematic diagram showing the inferred impact of the deletion genotypes in Indian patients with cardiomyopathy

## Supplementary Figure 5

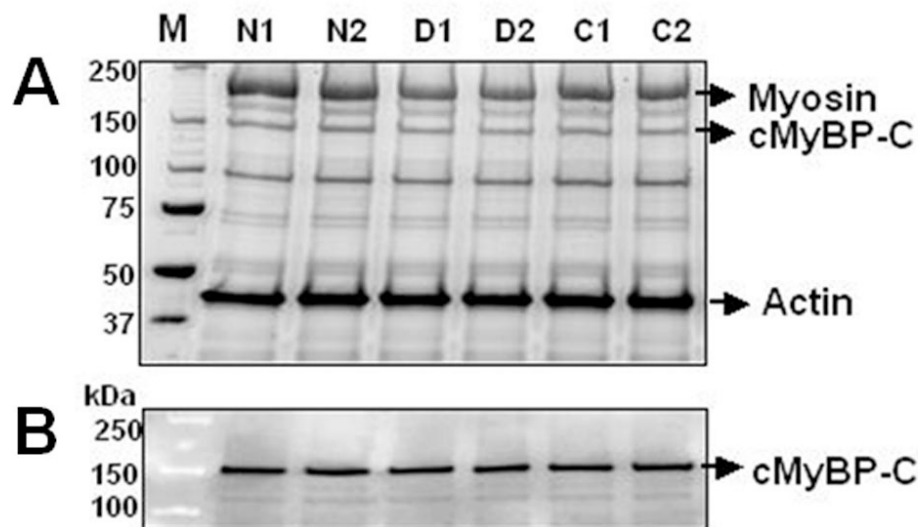**Supplementary Figure 5 . cMyBP-C protein in Myocardial biopsies**

A, SDS-PAGE analysis of the total myofibrillar proteins from two different index patients with heterozygous deletions (D1 and D2). Reference samples of ventricular tissue from normal donor (N1 and N2) and patients with aortic stenosis (C1), and ventricular septum defect (C2) were used as controls.

B, Western blot analyses of the same samples illustrating the absence of expected mutated protein (approx.140 kDa) in the patients with the 25bp deletion (D1 and D2). Cardiac MyBP-C was detected using a rabbit polyclonal antibody directed against C0-C1 of human cMyBP-C (S7). M, molecular weight markers.



## Supplementary Figure 6

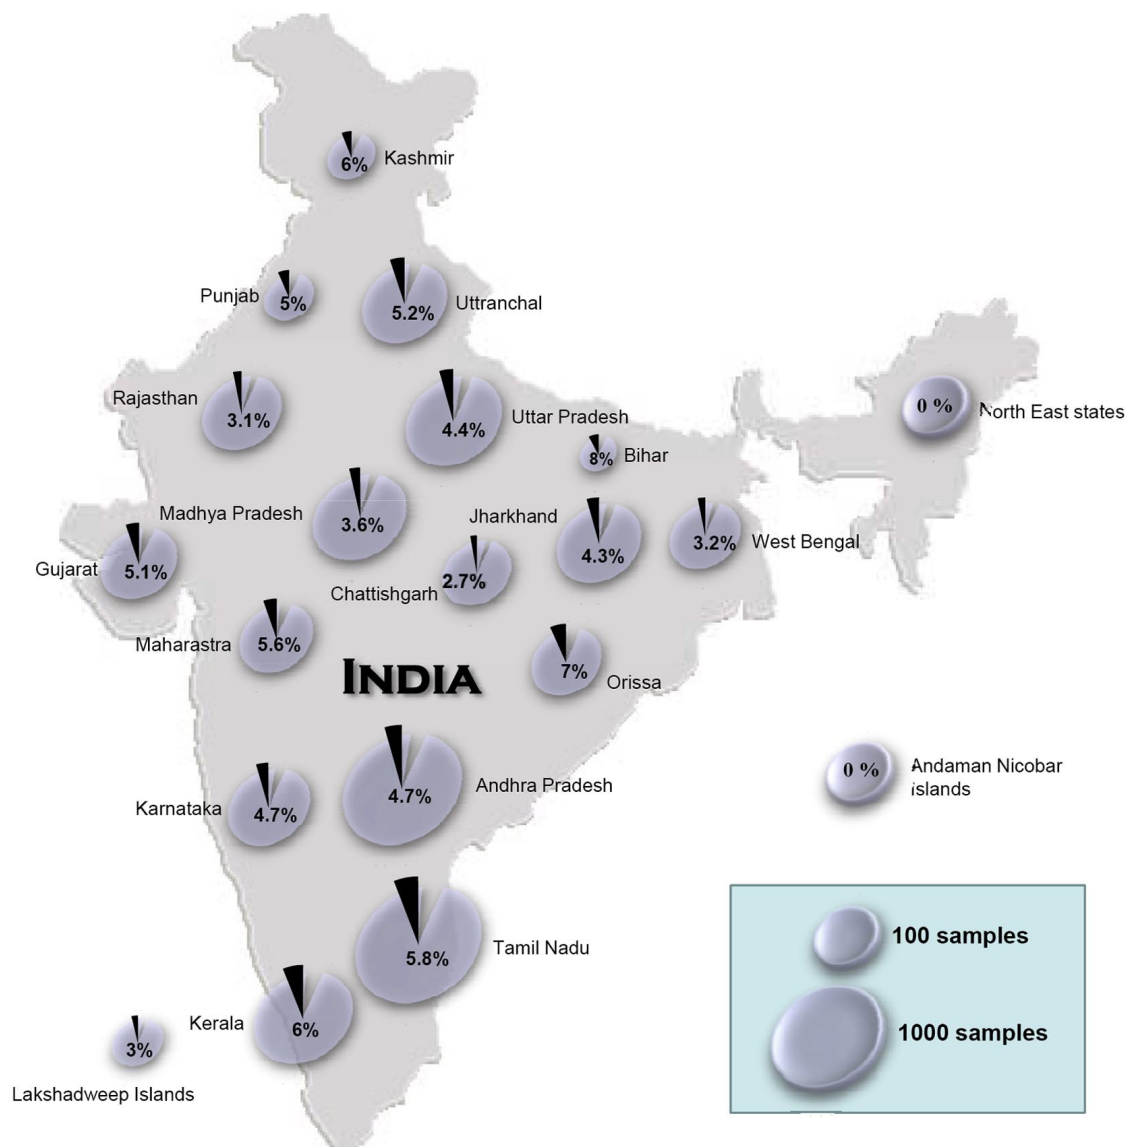

**Supplementary Figure 6.** Distribution of the 25 bp deletion of *MYBPC3* and its frequency in Indian States.

## Supplementary Figure 7

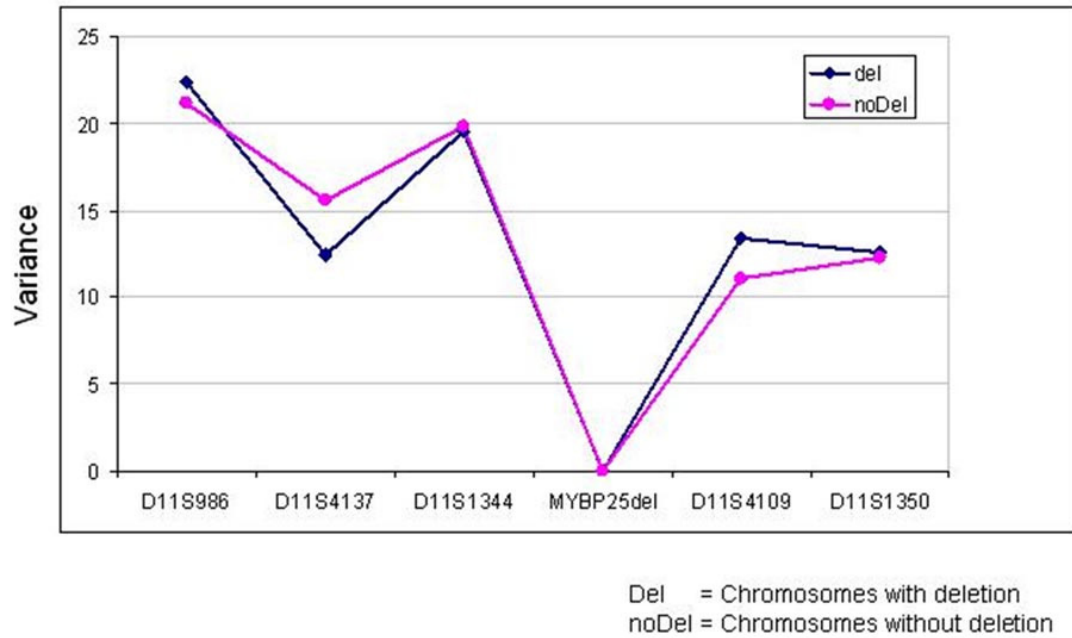

**Supplementary Figure 7.** Variance of 25bp deleted and non-deleted chromosomes using five STR markers.

## Supplementary Figure 8

|              | 2428 | 3817 | 4009 | 4255 | 4555 | 6520 | 6638 | 7500 | 7927 | 8114 | 8262 | 8563 | 8668 | 9016 | 9287 | 9342 | 9665 | 9851 | 10253 | 10872 | 11138 | 11456 | 11579 | 11726 | 12723 |
|--------------|------|------|------|------|------|------|------|------|------|------|------|------|------|------|------|------|------|------|-------|-------|-------|-------|-------|-------|-------|
| BRU267_del   | T    | T    | T    | C    | A    | A    | A    | D    | C    | C    | T    | C    | G    | T    | G    | I    | T    | A    | A     | G     | T     | T     | C     | A     | G     |
| BRU310_del   | C    | T    | T    | C    | A    | A    | A    | D    | C    | C    | T    | C    | G    | T    | G    | I    | T    | A    | A     | G     | T     | T     | C     | A     | G     |
| BSK076_del   | T    | T    | T    | C    | A    | A    | A    | D    | C    | C    | T    | C    | G    | T    | G    | I    | T    | A    | A     | G     | T     | T     | C     | G     | G     |
| BSK078_del   | T    | T    | T    | C    | A    | A    | A    | D    | C    | C    | T    | C    | G    | T    | G    | I    | T    | A    | A     | G     | T     | T     | C     | A     | G     |
| PKH009_del   | T    | T    | T    | C    | A    | A    | A    | D    | C    | C    | T    | C    | G    | T    | G    | I    | C    | A    | A     | G     | T     | T     | C     | A     | G     |
| SDH121_del   | T    | A    | T    | C    | A    | A    | A    | D    | C    | C    | T    | C    | G    | T    | G    | I    | T    | A    | A     | G     | T     | T     | C     | A     | G     |
| SDH129_del   | T    | T    | T    | C    | A    | A    | A    | D    | C    | C    | T    | C    | G    | T    | G    | I    | T    | A    | A     | G     | T     | T     | C     | A     | G     |
| SDH155_del   | T    | T    | T    | C    | A    | A    | A    | D    | C    | C    | T    | C    | G    | T    | G    | I    | T    | A    | A     | G     | T     | T     | C     | A     | G     |
| SYD016_del   | T    | T    | T    | C    | A    | A    | A    | D    | C    | C    | T    | C    | G    | T    | G    | I    | T    | A    | A     | G     | T     | T     | C     | A     | G     |
|              |      |      |      |      |      |      |      |      |      |      |      |      |      |      |      |      |      |      |       |       |       |       |       |       |       |
| BRU267_undel | C    | T    | C    | T    | A    | A    | A    | I    | T    | C    | T    | T    | A    | T    | A    | D    | C    | A    | A     | G     | T     | T     | T     | G     | G     |
| BRU310_undel | C    | T    | C    | T    | A    | A    | A    | I    | T    | C    | T    | T    | A    | T    | A    | D    | C    | A    | A     | G     | T     | T     | T     | G     | G     |
| BSK076_undel | C    | T    | C    | C    | T    | G    | G    | I    | C    | C    | T    | C    | G    | C    | G    | I    | C    | A    | A     | C     | C     | G     | C     | G     | A     |
| BSK078_undel | C    | T    | C    | T    | A    | A    | A    | I    | T    | C    | T    | T    | A    | T    | A    | D    | C    | A    | A     | G     | T     | T     | T     | G     | G     |
| PKH009_undel | C    | T    | C    | T    | A    | A    | A    | I    | T    | C    | T    | T    | A    | T    | A    | D    | C    | A    | A     | G     | T     | T     | T     | G     | G     |
| SDH121_undel | C    | T    | C    | C    | T    | G    | G    | I    | C    | C    | T    | C    | G    | C    | G    | I    | C    | A    | A     | C     | C     | G     | C     | G     | A     |
| SDH129_undel | C    | T    | C    | C    | T    | A    | G    | I    | C    | C    | C    | C    | G    | T    | G    | I    | C    | A    | G     | C     | C     | G     | C     | G     | A     |
| SDH155_undel | C    | T    | C    | C    | T    | A    | G    | I    | C    | C    | T    | C    | G    | C    | G    | I    | C    | G    | A     | C     | C     | G     | C     | G     | A     |
| SYD016_undel | C    | T    | C    | C    | T    | A    | G    | I    | C    | A    | T    | C    | G    | C    | G    | I    | C    | A    | A     | G     | C     | G     | C     | G     | A     |

Supplementary Figure 8. Details of SNPs and insertion/deletion polymorphism

## 2. Supplementary Tables

**Supplementary Table 1.** Baseline characteristics of the patients studied

| <b>Characteristics of the Patients</b> | <b>Group 1<br/>(n= 321 cases)</b> | <b>Group-2<br/>(n= 446 cases)</b> |
|----------------------------------------|-----------------------------------|-----------------------------------|
| Age (yrs)                              | 48±8                              | 49± 12                            |
| Male sex (%)                           | 67                                | 64                                |
| NYHA class III or IV (%)               | 35                                | 40                                |
| Dyspnea (%)                            | 70                                | 66                                |
| Angina pectoris (%)                    | 52                                | 57                                |
| Syncope (%)                            | 27                                | 32                                |
| Hypertrophic Cardiomyopathy (n)        | 193                               | 164                               |
| LVEDD, mm                              | 35 ±7.41                          | 37.00 ±5.69                       |
| LVESD, mm                              | 17±8.15                           | 18± 5.2                           |
| Septum, mm                             | 22.4±5.32                         | 23.12± 3.17                       |
| Abnormal ECG (%)                       | 68                                | 62                                |
| Dilated Cardiomyopathy (n)             | 118                               | 277                               |
| LVEF at the time of enrollment         | 32 ± 12                           | 29.57 ± 12.09                     |
| Restrictive Cardiomyopathy (n)         | 10                                | 5                                 |
| LA diameter, mm                        | 49 ± 5.9                          | 48.6 ± 2.9                        |
| LVEDD, mm                              | 38.8± 13.3                        | 35.8± 6                           |
| LVEF, (%)                              | 58.20± 3.24                       | 58.00± 3.24                       |
| Abnormal ECG (%)                       | 85%                               | 90%                               |

**Supplementary Table 2: Ancestry Informative Markers used in the present study**

| S.No | SNPs       | Chromosome position | Genetic position | Physical position | Reference allele | Variant allele | CEU frequency | Indian Frequency |
|------|------------|---------------------|------------------|-------------------|------------------|----------------|---------------|------------------|
| 1    | rs12913832 | 15                  | 0.294016         | 26039213          | A                | G              | 0.216         | 0.935            |
| 2    | rs1869829  | 2                   | 1.512994         | 135711294         | C                | T              | 0.198         | 0.829            |
| 3    | rs8050463  | 16                  | 0.577824         | 30461660          | A                | G              | 0.181         | 0.785            |
| 4    | rs6974649  | 7                   | 1.385698         | 130270352         | G                | T              | 0.284         | 0.884            |
| 5    | rs1257000  | 2                   | 1.144331         | 97100193          | A                | G              | 0.871         | 0.279            |
| 6    | rs1481356  | 1                   | 2.378998         | 215297063         | A                | G              | 0.802         | 0.209            |
| 7    | rs7127335  | 11                  | 0.572031         | 38559782          | A                | G              | 0.267         | 0.855            |
| 8    | rs1378942  | 15                  | 0.891213         | 72864420          | A                | C              | 0.672         | 0.105            |
| 9    | rs7034211  | 9                   | 0.298405         | 14127320          | C                | T              | 0.259         | 0.831            |
| 10   | rs4944957  | 11                  | 0.782314         | 70845683          | C                | T              | 0.754         | 0.169            |
| 11   | rs10800779 | 1                   | 2.129964         | 198132682         | C                | T              | 0.19          | 0.767            |
| 12   | rs1330303  | 9                   | 0.355379         | 16705826          | C                | T              | 0.698         | 0.14             |
| 13   | rs12416652 | 10                  | 1.007332         | 77778952          | C                | T              | 0.198         | 0.765            |
| 14   | rs2710994  | 7                   | 0.42602          | 24756695          | A                | G              | 0.078         | 0.616            |
| 15   | rs611555   | 6                   | 0.183087         | 7020821           | A                | G              | 0.284         | 0.833            |
| 16   | rs12945601 | 17                  | 0.434115         | 17594136          | C                | T              | 0.733         | 0.18             |
| 17   | rs12550668 | 8                   | 0.242301         | 11617363          | C                | T              | 0.621         | 0.122            |
| 18   | rs271762   | 1                   | 2.55734          | 230976582         | C                | T              | 0.328         | 0.849            |
| 19   | rs7999348  | 13                  | 0.940914         | 98730923          | C                | T              | 0.207         | 0.738            |
| 20   | rs1992906  | 5                   | 1.874684         | 173115417         | A                | G              | 0.888         | 0.366            |
| 21   | rs2158298  | 17                  | 0.636443         | 36325760          | A                | G              | 0.655         | 0.141            |
| 22   | rs756411   | 16                  | 0.175355         | 7549913           | A                | G              | 0.121         | 0.657            |
| 23   | rs10932521 | 2                   | 2.174991         | 214694847         | A                | G              | 0.328         | 0.86             |
| 24   | rs9655117  | 7                   | 0.276422         | 14724599          | A                | G              | 0.069         | 0.558            |
| 25   | rs998382   | 20                  | 0.516865         | 30847797          | C                | T              | 0.293         | 0.819            |
| 26   | rs1941411  | 11                  | 1.280712         | 119635722         | C                | T              | 0.276         | 0.802            |
| 27   | rs6890009  | 5                   | 1.342041         | 131607932         | G                | T              | 0.371         | 0.866            |
| 28   | rs10884942 | 10                  | 1.3497           | 112006916         | A                | G              | 0.741         | 0.218            |
| 29   | rs1981760  | 16                  | 0.616971         | 49280575          | C                | T              | 0.224         | 0.75             |
| 30   | rs594387   | 1                   | 0.740561         | 46925406          | C                | T              | 0.155         | 0.69             |
| 31   | rs7018694  | 9                   | 0.409581         | 20242341          | A                | G              | 0.293         | 0.808            |
| 32   | rs541805   | 9                   | 0.492671         | 25924932          | A                | G              | 0.888         | 0.355            |
| 33   | rs4759128  | 12                  | 0.704256         | 53651487          | A                | G              | 0.905         | 0.401            |
| 34   | rs7120706  | 11                  | 1.232979         | 116335297         | C                | T              | 0.759         | 0.238            |
| 35   | rs11240351 | 1                   | 2.195556         | 201775996         | C                | T              | 0.448         | 0.912            |
| 36   | rs5007171  | 3                   | 0.664617         | 45124712          | C                | T              | 0.14          | 0.669            |
| 37   | rs8106293  | 19                  | 0.560374         | 38228216          | C                | T              | 0.767         | 0.262            |
| 38   | rs1555741  | 1                   | 0.680782         | 39162214          | A                | G              | 0.103         | 0.622            |
| 39   | rs8081017  | 17                  | 1.003372         | 67980475          | C                | T              | 0.19          | 0.726            |
| 40   | rs16954273 | 16                  | 0.709095         | 53694406          | A                | G              | 0.948         | 0.459            |
| 41   | rs543759   | 18                  | 0.233667         | 7498561           | A                | G              | 0.746         | 0.235            |
| 42   | rs2232704  | 14                  | 0.937742         | 93825872          | C                | T              | 0.828         | 0.292            |
| 43   | rs9893521  | 17                  | 0.127596         | 4946472           | A                | G              | 0.862         | 0.372            |
| 44   | rs4685803  | 3                   | 0.117294         | 4715592           | A                | G              | 0.336         | 0.847            |
| 45   | rs11774017 | 8                   | 1.089252         | 98297141          | A                | G              | 0.655         | 0.169            |
| 46   | rs623345   | 6                   | 1.294446         | 128148100         | A                | G              | 0.267         | 0.756            |
| 47   | rs12595616 | 15                  | 1.075976         | 89364517          | C                | T              | 0.307         | 0.791            |
| 48   | rs3844335  | 8                   | 0.800159         | 62356446          | C                | T              | 0.103         | 0.612            |
| 49   | rs9376327  | 6                   | 1.046437         | 100194102         | C                | T              | 0.974         | 0.541            |
| 50   | rs12757113 | 1                   | 0.517879         | 26281286          | C                | T              | 0.259         | 0.768            |

**Supplementary Table 3.** Genotypic-phenotypic correlation between symptomatic deletion carriers, asymptomatic carriers and non-carriers among the 120 members from 28 family affected with cardiomyopathy.

| Patients' details   | Symptomatic carriers (n=32) | Asymptomatic carriers (n=56) | Non carriers (n=32) |
|---------------------|-----------------------------|------------------------------|---------------------|
| Age                 | 55.7 ± 15.3                 | 40 ± 14.1                    | 40 ± 12.6           |
| Sex, Males, %       | 45                          | 55                           | 35                  |
| Dyspnea, %          | 100                         | 40                           | 0                   |
| Angina Pectoris, %  | 42                          | 22                           | 0                   |
| Syncope, %          | 63                          | 15                           | 0                   |
| Hypertension, %     | 12                          | 16                           | 28                  |
| LVEDD, mm           | 38.2 ± 6.2                  | 44 ± 4.3                     | 44 ± 3.3            |
| LVESD, mm           | 20.3 ± 3.8                  | 26.3 ± 3.5                   | 25.2 ± 3.4          |
| Septum, mm          | 23.2 ± 4.2                  | 11.6 ± 2.1                   | 10.3 ± 2.4          |
| LVEF, % (in DCM)    | 32 ± 8.2                    | 53.6 ± 11.3                  | 64.0 ± 6            |
| Abnormal ECG, %     | 90                          | 45                           | 0                   |
| LVH, %              | 60                          | 10                           | 0                   |
| Aberrant T waves, % | 40                          | 12                           | 0                   |
| Altered Q waves, %  | 10                          | 5                            | 0                   |

**Values are mean ±SD unless otherwise indicated. LVEDD, left ventricular end-diastolic diameter; LVESD, left ventricular end-systolic diameter**

**Supplementary Table 4.** Details of the Indian populations screened for the 25bp deletion. **Homozygous deleted individuals are shown in parenthesis.**

| Indian Populations    | Total | Deleted | Frequency |
|-----------------------|-------|---------|-----------|
| <b>South India</b>    |       |         |           |
| <b>TAMIL NADU</b>     |       |         |           |
| Marvar                | 50    | 3       | 0.06      |
| Kallar                | 60    | 7 (1)   | 0.11      |
| Irulas                | 85    | 7       | 0.08      |
| Kurumba               | 32    | 3       | 0.09      |
| Agamudaiyar           | 48    | 3       | 0.06      |
| Paniyan               | 50    | 3       | 0.06      |
| Toda                  | 100   | 7       | 0.07      |
| Kota                  | 74    | 4       | 0.05      |
| Baduga                | 60    | 2       | 0.03      |
| Chakkiliar            | 65    | 4       | 0.06      |
| Khani                 | 50    | 2       | 0.04      |
| Malayali              | 90    | 5       | 0.05      |
| Parayar               | 60    | 4       | 0.06      |
| Paliyar               | 57    | 3       | 0.05      |
| Malaikurvar           | 24    | 1       | 0.04      |
| Kondareddy            | 16    | 0       | -         |
| Arundathi             | 40    | 2       | 0.05      |
| Lingayath             | 85    | 3       | 0.03      |
| Anglo-Indian          | 34    | 0       | -         |
| <b>KERALA</b>         |       |         |           |
| Oorali                | 47    | 2       | 0.04      |
| Kattunayakkan         | 97    | 4 (1)   | 0.04      |
| Kurcha                | 33    | 2       | 0.06      |
| Kuruman               | 30    | 2       | 0.06      |
| Muslims and others    | 200   | 15      | 0.07      |
| Malayan               | 100   | 5       | 0.05      |
| Ulladan               | 50    | 3       | 0.06      |
| Karimbala             | 53    | 4       | 0.07      |
| <b>KARNATAKA</b>      |       |         |           |
| Halakki               | 40    | 2       | 0.05      |
| Kunabi                | 44    | 2       | 0.04      |
| <b>ANDHRA PRADESH</b> |       |         |           |
| Goud                  | 100   | 7       | 0.07      |

|                          |    |       |      |
|--------------------------|----|-------|------|
| Kolma                    | 48 | 1     | 0.02 |
| Yanadi                   | 43 | 2     | 0.04 |
| Chenchu                  | 28 | 1     | 0.03 |
| Siddi (African settlers) | 20 | 0     | -    |
| Erkula                   | 79 | 5 (1) | 0.06 |
| Thotti                   | 54 | 4     | 0.07 |
| Gowda                    | 49 | 2     | 0.04 |
| Muslims                  | 35 | 1     | 0.02 |
| Velamma                  | 47 | 2     | 0.04 |
| Padmashali               | 44 | 2     | 0.04 |
| Sagara                   | 60 | 3     | 0.05 |
| Sugali                   | 47 | 2     | 0.04 |
| Madiga                   | 67 | 3     | 0.04 |
| Lambadi                  | 46 | 2     | 0.04 |
| Vysyas                   | 35 | 1     | 0.02 |
| <b>West India</b>        |    |       |      |
| <b>MAHARASTRA</b>        |    |       |      |
| Mahadekoli               | 89 | 4 (1) | 0.04 |
| Thakar                   | 90 | 7     | 0.07 |
| Parsi                    | 50 | 2     | 0.04 |
| Katkari                  | 18 | 1     | 0.05 |
| <b>GUJARAT</b>           |    |       |      |
| Rathwa                   | 50 | 3     | 0.06 |
| Koli                     | 69 | 5     | 0.07 |
| Tadvi                    | 47 | 2 (1) | 0.04 |
| Girasia                  | 49 | 2     | 0.04 |
| Vatika Gond              | 50 | 2     | 0.04 |
| Bhils                    | 48 | 2     | 0.04 |
| <b>Central India</b>     |    |       |      |
| <b>MADHYA PRADESH</b>    |    |       |      |
| Bhilala                  | 53 | 1     | 0.01 |
| Barela                   | 20 | 7     | 0.35 |
| KOL                      | 96 | 3 (1) | 0.03 |
| Bhils                    | 40 | 1     | 0.02 |
| Gond                     | 42 | 1     | 0.02 |
| Mawasi                   | 96 | 2     | 0.02 |
| Sahariya                 | 36 | 1     | 0.02 |
| Keers                    | 14 | 0     | -    |
| Korku                    | 6  | 0     | -    |
| Baiga                    | 30 | 1     | 0.03 |

**North India**



|                      |     |       |      |
|----------------------|-----|-------|------|
| <b>KASHMIR</b>       |     |       |      |
| Pandits              | 49  | 3     | 0.06 |
| <b>UTTRANCHAL</b>    |     |       |      |
| Tharus               | 30  | 1     | 0.03 |
| Buxas                | 48  | 2     | 0.04 |
| <b>UTTAR PRADESH</b> |     |       |      |
| Brahmin              | 35  | 2     | 0.05 |
| Sidhi                | 22  | 1     | 0.04 |
| Muslim               | 24  | 3 (1) | 0.12 |
| Haburra              | 48  | 1     | 0.02 |
| Chipi & lakodiga     | 91  | 2     | 0.02 |
| Rajput               | 86  | 7     | 0.08 |
| Diwari               | 99  | 3     | 0.03 |
| Yadava               | 64  | 2     | 0.03 |
| Saharia              | 12  | 0     | -    |
| Rohidas              | 50  | 2     | 0.04 |
| Kori                 | 50  | 3     | 0.06 |
| Lodhe                | 26  | 1     | 0.03 |
| <b>PUNJAB</b>        |     |       |      |
| Ramgarhia            | 58  | 4     | 0.06 |
| <b>RAJASTHAN</b>     |     |       |      |
| Bheels               | 50  | 2     | 0.04 |
| Meena                | 50  | 1     | 0.02 |
| Meghwal              | 26  | 1     | 0.03 |
| <b>CHATTISGARH</b>   |     |       |      |
| Sathnami             | 64  | 2     | 0.03 |
| Santhal              | 52  | 1     | 0.01 |
| Gond                 | 44  | 1     | 0.02 |
| Kanwar               | 22  | 1     | 0.04 |
| <b>HIMALAYAS</b>     |     |       |      |
| Bhist                | 112 | 5     | 0.04 |
| Bhotia               | 58  | 0     | -    |
| Random samples       | 264 | 15    | 0.05 |
| <b>East India</b>    |     |       |      |
| <b>WEST BENGAL</b>   |     |       |      |
| Random Samples       | 125 | 4     | 0.03 |
| <b>ORISSA</b>        |     |       |      |
| Oraon                | 32  | 4     | 0.12 |
| Kissan               | 14  | 1     | 0.07 |
| Dhurva               | 33  | 2     | 0.06 |
| Bonda                | 45  | 4     | 0.08 |

|                             |      |         |      |
|-----------------------------|------|---------|------|
| Gadaba                      | 31   | 0       | -    |
| <b>BIHAR</b>                |      |         |      |
| Oraon                       | 48   | 4       | 0.08 |
| <b>JHARKAND</b>             |      |         |      |
| Ho                          | 66   | 4       | 0.06 |
| Munda                       | 50   | 1       | 0.02 |
| Oraon                       | 89   | 4       | 0.04 |
| <b>North East India</b>     |      |         |      |
| <b>NAGALAND</b>             |      |         |      |
| Chakhesang-Naga             | 55   | 0       | -    |
| Ao-Naga                     | 80   | 0       | -    |
| Naga-Sema                   | 53   | 0       | -    |
| <b>ARUNACHAL PRADESH</b>    |      |         |      |
| Nyshi                       | 50   | 0       | -    |
| <b>MIZORAM</b>              |      |         |      |
| Mizo                        | 45   | 0       | -    |
| North East (Random Samples) | 160  | 0       | -    |
| <b>ANDAMAN ISLANDS</b>      |      |         |      |
| Great Andamanese            | 20   | 0       | -    |
| Nicobarese                  | 48   | 0       | -    |
| Onges                       | 46   | 0       | -    |
| <b>LAKSHADWEEP ISLAND</b>   | 80   | 4 (1)   | 0.05 |
|                             | 6273 | 287 (8) | 0.04 |

**Supplementary Table 5.** Global distribution of the *MYBPC3* deletion in a panel of 8,358\* individuals from around the world

| Population Number | Population Names   | Country                      | Total Number of Samples | Deleted | Frequency |
|-------------------|--------------------|------------------------------|-------------------------|---------|-----------|
| 1                 | Bantu-speakers     | South Africa                 | 8                       | 0       | 0         |
| 2                 | San                | Namibia                      | 6                       | 0       | 0         |
| 3                 | Northeastern Bantu | Kenya                        | 12                      | 0       | 0         |
| 4                 | Mbuti Pygmies      | Democratic Republic of Congo | 11                      | 0       | 0         |
| 5                 | Biaka Pygmies      | Central African Republic     | 34                      | 0       | 0         |
| 6                 | Yoruba             | Nigeria                      | 23                      | 0       | 0         |
| 7                 | Madenka            | Senegal                      | 18                      | 0       | 0         |
| 8                 | Mozabite           | Algeria (Mzab region)        | 26                      | 0       | 0         |
| 9                 | Bedouin            | Israel (Negev region)        | 39                      | 0       | 0         |
| 10                | Palestinian        | Israel (Central)             | 47                      | 0       | 0         |
| 11                | Druze              | Israel (Carmel region)       | 41                      | 0       | 0         |
| 12                | Tuscan             | Italy                        | 8                       | 0       | 0         |
| 13                | Sardinian          | Italy                        | 26                      | 0       | 0         |
| 14                | North Italian      | [Italy (Bergamo region)      | 14                      | 0       | 0         |
| 15                | French             | France                       | 28                      | 0       | 0         |
| 16                | French Basque      | France                       | 24                      | 0       | 0         |
| 17                | Orcadian           | Orkney Islands               | 15                      | 0       | 0         |
| 18                | Russian            | Russia                       | 25                      | 0       | 0         |
| 19                | Adygei             | Russia (Caucasus region)     | 17                      | 0       | 0         |

|           |                      |                 |      |     |      |
|-----------|----------------------|-----------------|------|-----|------|
| <b>20</b> | Makrani <sup>§</sup> | Pakistan        | 63   | 1   | 0.01 |
| <b>21</b> | Brahui               | Pakistan        | 95   | 7   | 0.07 |
| <b>22</b> | Balochi              | Pakistan        | 32   | 0   | 0    |
| <b>23</b> | Hazara               | Pakistan        | 31   | 0   | 0    |
| <b>24</b> | Pathan               | Pakistan        | 105  | 3   | 0.02 |
| <b>25</b> | Kalash               | Pakistan        | 56   | 0   | 0    |
| <b>26</b> | Burusho              | Pakistan        | 91   | 9   | 0.09 |
| <b>27</b> | Kashmiri             | Pakistan        | 20   | 0   | 0    |
| <b>28</b> | Mohanna              | Pakistan        | 56   | 3   | 0.05 |
| <b>29</b> | Sindhi               | Pakistan        | 143  | 9   | 0.05 |
| <b>30</b> | Parsi                | Pakistan        | 78   | 0   | 0    |
| <b>31</b> | West Indians         | India           | 560  | 30  | 0.05 |
| <b>32</b> | North Indians        | India           | 1534 | 67  | 0.04 |
| <b>33</b> | North East Indians   | India           | 443  | 0   | 0    |
| <b>34</b> | East Indians         | India           | 533  | 28  | 0.05 |
| <b>35</b> | Central Indians      | India           | 433  | 16  | 0.03 |
| <b>36</b> | South Indians        | India           | 2656 | 150 | 0.05 |
| <b>37</b> | Sri Lankans          | Sri Lanka       | 21   | 2   | 0.09 |
| <b>38</b> | Andamanese           | Andaman Islands | 114  | 0   | 0    |
| <b>39</b> | Senoi                | Malaysia        | 54   | 0   | 0    |
| <b>40</b> | Semang               | Malaysia        | 110  | 0   | 0    |
| <b>41</b> | Aboriginal Malays    | Malaysia        | 108  | 4   | 0.03 |
| <b>42</b> | Tengger              | Indonesia       | 22   | 1   | 0.04 |
| <b>43</b> | Bali                 | Indonesia       | 15   | 0   | 0    |
| <b>44</b> | Toraja               | Indonesia       | 24   | 0   | 0    |
| <b>45</b> | Papuan               | New Guinea      | 16   | 0   | 0    |
| <b>46</b> | NAN Melanesian       | Bougainville    | 21   | 0   | 0    |
| <b>47</b> | Australian Aborigine | Australia       | 6    | 0   | 0    |
| <b>48</b> | Cambodian            | Cambodia        | 11   | 0   | 0    |
| <b>49</b> | Miaozu               | China           | 10   | 0   | 0    |
| <b>50</b> | Dai                  | China           | 10   | 0   | 0    |

|           |           |                               |    |   |   |
|-----------|-----------|-------------------------------|----|---|---|
| <b>51</b> | Lahu      | China                         | 10 | 0 | 0 |
| <b>52</b> | Yizu      | China                         | 10 | 0 | 0 |
| <b>53</b> | She       | China                         | 10 | 0 | 0 |
| <b>54</b> | Naxi      | China                         | 10 | 0 | 0 |
| <b>55</b> | Tujia     | China                         | 10 | 0 | 0 |
| <b>56</b> | Han       | China                         | 44 | 0 | 0 |
| <b>57</b> | Tu        | China                         | 10 | 0 | 0 |
| <b>58</b> | Uygur     | China                         | 10 | 0 | 0 |
| <b>59</b> | Mongola   | China                         | 10 | 0 | 0 |
| <b>60</b> | Oroqen    | China                         | 10 | 0 | 0 |
| <b>61</b> | Xibe      | China                         | 9  | 0 | 0 |
| <b>62</b> | Daur      | China                         | 10 | 0 | 0 |
| <b>63</b> | Hezhen    | China                         | 9  | 0 | 0 |
| <b>64</b> | Japanese  | Japan                         | 30 | 0 | 0 |
| <b>65</b> | Yakut     | Russia<br>(Siberia<br>region) | 22 | 0 | 0 |
| <b>66</b> | Pima      | Mexico                        | 19 | 0 | 0 |
| <b>67</b> | Maya      | Mexico                        | 24 | 0 | 0 |
| <b>68</b> | Colombian | Colombia                      | 13 | 0 | 0 |
| <b>69</b> | Surui     | Brazil                        | 20 | 0 | 0 |
| <b>70</b> | Karitiana | Brazil                        | 23 | 0 | 0 |

\*The study population also includes 120 samples from the HapMap project including JPT, CEU, YRI and HCB.

§ Includes both Negroid (38) and Baloch (25) samples. The deletion is observed in Negroid (1/38).

**Supplementary Table 6.** Sequences of primers used for STR analysis

| <b>Primer</b> | <b>Forward</b>            | <b>Reverse</b>       |
|---------------|---------------------------|----------------------|
| 1350          | HEX: CATTCTGGGGTCTTTGAT   | CGTGTGTGTGTATGTGGG   |
| 4109          | TET: CTGGGAGTTAGGAGACCTGG | TTGAAGAGCCCTCACAGAC  |
| 1344          | HEX: TGGCAGTTATGGTTGTCTTC | GCGCCTGGCTTGTACATATA |
| 4137          | FAM: ATTGCTTGGACCCAGG     | TGATAAAGACATACCCGAGG |
| 986           | FAM: GAAGGACTCGGCTCCAG    | GTAAGAGGATGGTAGGAGGG |

**Supplementary Table 7.** *MYBPC3* allele-specific long PCR primers:

| <b>Primer</b> | <b>Forward</b>                | <b>Reverse</b>                    |
|---------------|-------------------------------|-----------------------------------|
| LP_1          | CTG GAT GGC TTC CCT CCC TCT C | ACA GTT CGA GGC GTC TTT GT        |
| LP_2          | TGT ACA AAG GGG TGG AGG AG    | AGG GAG GGA AGC CAT CCA GGC       |
| DLP_3         | CCC TGC CAG GTC CCC TCT CTT T | ACA GTT CGA GGC GTC TTT GT        |
| DLP_4         | TTT GGG TGT GGA GAA TGA AT    | CGG GCT ATA AAT AAG GTA AAG AGA G |

**Supplementary Table 8.** Primers used for nested amplification and sequencing of the region upstream of the 25 bp deletion of the *MYBPC3* gene.

| Primers | Sequence                 | Melting Temperature (°C) | Position on Chr 11 (bp) | Length (bp) | Amplicon size (bp) | Overlap Between Amplicons (bp) |
|---------|--------------------------|--------------------------|-------------------------|-------------|--------------------|--------------------------------|
| MYUP1F  | GGTGTGGAGAATGAATGAAACAT  | 60.11                    | 47316281                | 23          | 614                |                                |
| MYUP1R  | ACCGGTAGCTCTTCTTCTTCTTG  | 60.415                   | 47315668                | 23          |                    |                                |
| MYUP2F  | AGAAAGATCTCTTTGGATCTGGG  | 60.082                   | 47316054                | 23          | 650                | 340                            |
| MYUP2R  | AAGGAGACTGTGGATGTGAGTGT  | 60.088                   | 47315405                | 23          |                    |                                |
| MYUP3F  | AGCGCAAGAAGAAGAAGAGCTAC  | 60.789                   | 47315694                | 23          | 513                | 243                            |
| MYUP3R  | CTGGTCATCCCATATCATCCTAA  | 60.048                   | 47315182                | 23          |                    |                                |
| MYUP4F  | CAGCCATGCTAGACACTCACAT   | 60.343                   | 47315439                | 22          | 542                | 213                            |
| MYUP4R  | ACAGTCTCAACACCTGTTCTGC   | 59.425                   | 47314898                | 22          |                    |                                |
| MYUP5F  | TGGGAATAATGACACTGCCTATC  | 60.218                   | 47315238                | 23          | 535                | 294                            |
| MYUP5R  | AGAACTGAACAAACCAGGAATCA  | 60.026                   | 47314704                | 23          |                    |                                |
| MYUP6F  | ATCTGTCTGTGGAAAGAGTCCTG  | 59.793                   | 47315052                | 23          | 625                | 302                            |
| MYUP6R  | AACATGGTGAACACTCCGTCTCTA | 60.047                   | 47314428                | 23          |                    |                                |
| MYUP7F  | CTGATTCCTGGTTTGTTCAGTTC  | 60.026                   | 47314727                | 23          | 538                | 254                            |
| MYUP7R  | AGATCCATGCCCTAGACTCTGA   | 60.233                   | 47314190                | 22          |                    |                                |
| MYUP8F  | TTGTAGAGACGGAGTTTACCAT   | 60.047                   | 47314453                | 23          | 588                | 217                            |
| MYUP8R  | CAGGACAGATATTTCTCTGGGTG  | 60.005                   | 47313866                | 23          |                    |                                |
| MYUP9F  | AGTTCAGAGTCTAGGGCATGGAT  | 60.511                   | 47314372                | 23          | 666                | 302                            |
| MYUP9R  | AGTTCAAGTGATTCTCCTGCCTC  | 61.144                   | 47313707                | 23          |                    |                                |
| MYUP10F | TTGAGCAGATTCACCTGTAGTCA  | 59.928                   | 47313946                | 23          | 540                | 351                            |
| MYUP10R | CCTCTGATAGGAATCTCCAGGAT  | 59.94                    | 47313407                | 23          |                    |                                |
| MYUP11F | AGTGCGAAATCAGCAACTACATT  | 60.203                   | 47313792                | 23          | 518                | 339                            |
| MYUP11R | GTCCTTACCAGTATCGATGTGT   | 60.303                   | 47313275                | 23          |                    |                                |
| MYUP12F | GAGGCAGGAGAATCACTTGAACCT | 61.144                   | 47313571                | 23          | 624                | 250                            |
| MYUP12R | CTAAAGTGCTGGGATTACAGGCT  | 60.984                   | 47312948                | 23          |                    |                                |
| MYUP13F | ACACATCGATACTGGTGAAGGAC  | 60.303                   | 47313297                | 23          | 641                | 303                            |
| MYUP13R | AGGGACTGACATACACCAAGAGA  | 60.045                   | 47312657                | 23          |                    |                                |
| MYUP14F | GATCACTTGAGGTCAGGAGTTTG  | 60.16                    | 47312931                | 23          | 564                | 228                            |
| MYUP14R | CAACTTGACTGAAGTCACACAGC  | 60.006                   | 47312368                | 23          |                    |                                |
| MYUP15F | TCAGTCCCTTAGTTCTGGAACAG  | 59.797                   | 47312665                | 23          | 678                | 251                            |
| MYUP15R | GATGGGAACAACACACTATAGCC  | 59.781                   | 47311988                | 23          |                    |                                |
| MYUP16F | TCAGTCAAGTTGCTTACCCTCTC  | 59.936                   | 47312379                | 23          | 672                | 346                            |
| MYUP16R | CCTGTCTCCATGTTCTCAAT     | 60.361                   | 47311708                | 22          |                    |                                |
| MYUP17F | GCTATAGTGTGTTGCCATCC     | 59.781                   | 47312009                | 23          | 615                | 256                            |
| MYUP17R | ACTCCAGAGCCACATTAAGACC   | 59.643                   | 47311395                | 22          |                    |                                |
| MYUP18F | ATTGAGAACATGGAGGACAAGG   | 60.361                   | 47311729                | 22          | 542                | 289                            |
| MYUP18R | CCCTACTATGGAGGGATTAGAT   | 59.713                   | 47311188                | 23          |                    |                                |
| MYUP19F | AGGATCTCCGGGTGACTGAC     | 61.48                    | 47311442                | 20          | 655                | 211                            |
| MYUP19R | AGAAGTCCAGGGCCTTATAGTTG  | 60.031                   | 47310788                | 23          |                    |                                |



**Supplementary Table 9.** Primers used for amplification and sequencing of the region downstream of the 25 bp deletion of the *MYBPC3* gene.

| Primers   | Sequence                 | Melting Temperature (°C) | Position on Chr 11 (bp) | Length (bp) | Amplicon size (bp) | Overlap Between Amplicons (bp) |
|-----------|--------------------------|--------------------------|-------------------------|-------------|--------------------|--------------------------------|
| MYDOWN1F  | ACTCTGGAGATTAGAAAGCCCTG  | 60.261                   | 47310304                | 23          | 557                |                                |
| MYDOWN1R  | CAGGAGACACACTTGTCCACACAT | 60.127                   | 47309748                | 23          |                    |                                |
| MYDOWN2F  | AGATGGGCAATAGCTTCCAGA    | 61.095                   | 47310069                | 21          | 556                | 277                            |
| MYDOWN2R  | ACACCGAAATTGAGAAGAGTGAG  | 59.803                   | 47309514                | 23          |                    |                                |
| MYDOWN3F  | ATGTGTGACAAGTGTGTCTCCTG  | 60.127                   | 47309770                | 23          | 627                | 210                            |
| MYDOWN3R  | TATCTGCTCTCACTTTGCTGTGA  | 60.204                   | 47309144                | 23          |                    |                                |
| MYDOWN4F  | ACTCACTTCTCAATTCGGTG     | 59.803                   | 47309537                | 23          | 637                | 347                            |
| MYDOWN4R  | ATCACAACACTGAGATTCTGCCT  | 60.189                   | 47308901                | 23          |                    |                                |
| MYDOWN5F  | TTGATCTTTCACAGCAAAGTGAGA | 60.045                   | 47309173                | 23          | 596                | 226                            |
| MYDOWN5R  | TGCTTCCACTGCATAGAACTCC   | 60.675                   | 47308578                | 23          |                    |                                |
| MYDOWN6F  | ATCTCAGTGTGTGATTGTGCTG   | 60.23                    | 47308916                | 23          | 662                | 293                            |
| MYDOWN6R  | GAAGGAAGGAAGGAGATGAGGT   | 60.075                   | 47308255                | 22          |                    |                                |
| MYDOWN7F  | TCTATGCAGTGGAAGACACTCCT  | 60.316                   | 47308595                | 23          | 532                | 294                            |
| MYDOWN7R  | GGTATGGGCAAGAAATGACTGTA  | 60.25                    | 47308064                | 23          |                    |                                |
| MYDOWN8F  | TAATCTCAGTTCAGGTGAGGACG  | 60.666                   | 47308461                | 23          | 544                | 353                            |
| MYDOWN8R  | AGTGGTTCGAGGCTAGTGGAGT   | 60.324                   | 47307918                | 21          |                    |                                |
| MYDOWN9F  | AGGTGTCATTTAACACAAGGCAG  | 60.45                    | 47308195                | 23          | 644                | 231                            |
| MYDOWN9R  | TTTGTGTCCTTGAGACATTTGTG  | 60.06                    | 47307552                | 23          |                    |                                |
| MYDOWN10F | ACTCCACTAGCCTCGACCACT    | 60.324                   | 47307938                | 21          | 513                | 342                            |
| MYDOWN10R | ATGTGTCCCTCTGAGTGTGTCTT  | 60.088                   | 47307426                | 23          |                    |                                |
| MYDOWN11F | ACTCCTCACAGAGTAAAAGTCTG  | 59.606                   | 47307691                | 23          | 580                | 219                            |
| MYDOWN11R | CTTCACATATGGAGATGGAGGAG  | 59.969                   | 47307112                | 23          |                    |                                |
| MYDOWN12F | AAGACACACTCAGAGGGACACAT  | 60.088                   | 47307448                | 23          | 641                | 290                            |
| MYDOWN12R | AGCCACAAGTACAAGACACCAAT  | 59.978                   | 47306830                | 23          |                    |                                |
| MYDOWN13F | CACGATACTGAGACTCCTCCATC  | 60.146                   | 47307147                | 23          | 627                | 293                            |
| MYDOWN13R | GTAGAATCACGGCCATCAAGTAA  | 60.377                   | 47306521                | 23          |                    |                                |
| MYDOWN14F | ATTGGTGTCTTGTACTTGTGGCT  | 59.978                   | 47306830                | 23          | 520                | 263                            |
| MYDOWN14R | ACGGGAAGTGTGTTTAAATGAC   | 60.199                   | 47306311                | 23          |                    |                                |
| MYDOWN15F | CAGCAGCTTAGGCTATGACAGG   | 61.423                   | 47306658                | 22          | 584                | 303                            |
| MYDOWN15R | GGCTGTGGACATGTGTGTATTT   | 59.786                   | 47306075                | 22          |                    |                                |
| MYDOWN16F | AGCTCTCTCTAGCTTGTGTCCAA  | 59.846                   | 47306400                | 23          | 579                | 279                            |
| MYDOWN16R | GCTTCTTGCTCTACCTTTGATGA  | 60.035                   | 47305822                | 23          |                    |                                |
| MYDOWN17F | AAATACACACATGTCCACAGCC   | 59.786                   | 47306096                | 22          | 591                | 229                            |
| MYDOWN17R | GCTGTGTTTGTGCTTCATTCTTT  | 60.694                   | 47305506                | 23          |                    |                                |
| MYDOWN18F | TCATCAAAGGTAGAGCAAGAAGC  | 60.035                   | 47305844                | 23          | 688                | 292                            |
| MYDOWN18R | GTTTCGAGTTAGAGGTGGTCCT   | 60.049                   | 47305157                | 23          |                    |                                |
| MYDOWN19F | TAGACTCCTCTGTCCCTCAAGTG  | 59.924                   | 47305424                | 23          | 685                | 221                            |
| MYDOWN19R | CTTCTGTCCTCTCTTTGGGAAAT  | 60.115                   | 47304740                | 23          |                    |                                |

### 3. Supplementary Methods

#### Clinical Evaluation of Patients and Control Subjects

A total of 800 registered cardiomyopathy patients (Group 1 and 2) from (1) Madurai Rajaji Hospital, Madurai; (2) Sri Chitra Tirunal Institute of Medical Sciences and Technology, Trivandrum; (3) Care Hospital, Hyderabad; (4) Nilofar; (5) Krishna Institute of Medical Science, Hyderabad; (6) Nizam Institute of Medical Sciences, Hyderabad; (7) Government Medical College Hospital, Kozhikode (representing South India 1, 2 and 3, South East and West); (8) Post Graduate Institute of Medical Education and Research, Chandigarh; and (9) Seth GS Medical College and KEM Hospital, Mumbai (representing North 1, 2, Central and West India) were recruited with informed written consent (Table 1 and 2). In addition, 33 postmortem samples with heart failure were also included in this study. The institutional review boards of the study centers approved the Protocol. The cardiomyopathy cases include all the three major forms of cardiomyopathies (hypertrophic, dilated and restrictive).

#### Diagnostic criteria of the index patients

**Hypertrophic cardiomyopathy:** Individuals were diagnosed with HCM when echocardiography identified unexplained left ventricle hypertrophy greater than or equal to 13 mm, or they fulfilled proposed diagnostic criteria for HCM within the context of familial disease i.e., echocardiographic criteria and/or one of the following ECG abnormalities: left ventricular hypertrophy (Romhilt-Estes score  $\geq 4$ ); Q-waves (duration  $>0.04$  sec and/or a depth  $>1/4$  of ensuing R wave in at least two leads); and marked repolarization abnormalities (T-wave inversion in at least two leads).

**Restrictive cardiomyopathy:** Individuals were diagnosed with RCM in accordance with previous established criteria<sup>1</sup>. when echocardiography revealed the following: Doppler measurements consistent with restrictive left ventricular filling pattern (increased ratio of early diastolic filling [E] to atrial filling [A]  $\geq 2$ ; decreased deceleration time [DT]  $< 150$  ms; decreased isovolumic relaxation time [IVRT]  $< 70$  ms); reduced or low-normal left ventricular end diastolic dimension (LVED); normal or near-normal left ventricular wall thickness and systolic function.

**Dilated cardiomyopathy:** Individuals were diagnosed with DCM when echocardiographic demonstration of depressed systolic function of the left ventricle (LV) (LV ejection fraction (LVEF)  $<0.45$  and/or fractional shortening  $<0.25$ ) and a dilated LV (LV enddiastolic dimension  $>117\%$  of the predicted value corrected for age and body surface area) in the absence of other cardiac or systemic causes) were noticed<sup>2</sup>

#### Details of the patients

The details of the patients are given in Supplementary Table 1. Details of the classification and phenotyping of the postmortem cases have been published previously<sup>3</sup>. Archived, paraffin-embedded myocardial tissue blocks were the source of DNA for genotyping.

#### Selection of controls

In group 1, the patients and controls were matched with respect to geographical region (controls were healthy volunteers from the hospitals mentioned above and were unrelated to the cardiomyopathy patients), ethnicity (self reported), sex (67% males vs 64% males), age ( $48 \pm 8$  yrs vs  $47 \pm 10$  yrs), ECG parameters (85 % abnormal vs 100% normal) and Echocardiography (IVS;  $22.4 \pm 5.32$  mm vs  $10.5 \pm 2$  mm, LVEF;  $32 \pm 12$  vs  $58 \pm 6.3$ ). In group 2, the patients and controls were again matched for geographical region (as outlined in group 1), ethnicity (self reported), sex (64% males vs 68% males), age ( $49 \pm 12$  yrs vs  $48 \pm 8$  yrs). The

controls were apparently healthy with no familial history or symptoms of cardiovascular diseases.

### **Population stratification analysis using 50 ancestry-informative markers (AIMs) and Mantel-Haenszel test**

We ascertained 50 AIMs for inferring ancestry along a Europe-related axis using 86 samples from India, genotyped on the Affymetrix 6.0 chip (7 Bhil, 9 Tharu, 7 Meghwal, 10 Kurubma, 7 Hallaki, 5 Pandit, 4 Vaish, 2 Srivastava, 5 Vysya, 5 Naidu, 4 Velama, 5 Lodi, 4 Satnami, 4 Madiga, 3 Mala and 5 Kamsali) and 60 CEU samples from HapMap<sup>4</sup>. We chose 50 autosomal markers with the largest differences between India and CEU, requiring that markers be at least 2Mb apart. The average frequency difference between 86 India and 60 CEU samples at these markers was >50%. We genotyped a total of 456 cases and 338 controls selected from Table 1 and 2 (including the North, South and Central Indians samples) at these markers using the Sequenom iPLEX assay. 47 of the 50 markers passed quality control filters [Supplementary Table 2.]. We ran principal components analysis using the EIGENSOFT software<sup>5,6</sup>. Anova statistics for the difference between cases and controls from each population (North, Central and South) along the top eigenvector, representing the Europe-related axis, were also computed using the EIGENSOFT software<sup>5,6</sup>. Further data from the initial and six replicate association studies were combined in a meta-analysis using a Mantel-Haenszel test implemented in R and the result confirms our main association studies ( $M^2 = 47.8748$ ,  $df = 2$ ,  $p\text{-value} = 4.019e-11$ ).

### **Selection criteria for family members**

The 28 index patients and their family members were contacted and invited based on their interest to participate in the present genetic study. All the families were from South India and are unrelated. All the available family members were assessed with ECG and ECHO. Out of 28 families, 15 were HCM-related families, 12 were DCM-related families and one an RCM-related family. The details of the family members are given in Supplementary Table 2. Out of 28 families, six were selected as representative families (Supplementary Figure 4A) because they are high risk families with two or more cases of cardiomyopathies in first or second degree relatives. The remaining 22 families with moderate susceptibility displayed at least one or two cases of cardiomyopathies or families associated with heart failure due to cardiomyopathies in first or second degree relatives. Out of 22 families, seven families were designated as cardiac death related families since the index patients (7) died in course of the study period (2000-2007). The familial study also shows that the 25 bp deletion is inheritable with incomplete penetrance. The same criteria used to screen the index patients were followed to distinguish symptomatic and asymptomatic carriers.

### **Population Screening**

DNA samples of 6,273 individuals belonging to 107 ethnic groups were obtained from the DNA bank of the Centre for Cellular and Molecular Biology, Hyderabad, India (Collections of Dr. Lalji Singh and Dr. K. Thangaraj). The names of the populations and geographical locations are given in Supplementary Table 4. A total of 2,085 samples belonging to different countries outside India were obtained from the HGDP-CEPH panel<sup>7</sup>, The Wellcome Trust Sanger Institute, United Kingdom (Collection of Dr. Chris Tyler-Smith), Institute of Biotechnology and Genetic Engineering, Karachi, Pakistan (Collection of Prof. S. Qasim Medhi) and the University of Leeds, United Kingdom (Collection of Dr. Martin Richards). The samples were classified as North, South + Central, West, East and North East India as given in Supplementary Table 5 and the significance of differences in deletion carrier frequency between these regions of India was evaluated using a Fisher 2 by 5 test (<http://www.quantitativeskills.com/sisa/statistics/fiveby2.htm>).

### Genotyping and DNA sequence analysis

Genomic DNA of individuals with cardiac failure was isolated from peripheral blood lymphocytes and genotyped using a pair of primers (Forward primer: 5'-GTT TCC AGC CTT GGG CAT AGT C-3' and Reverse primer: 5'-GAG GAC AAC GGA GCA AAG CCC-3') flanking the 25bp deletion region. PCR products (WT: 403bp and mutant 378bp) were analysed on 3.5% agarose gel, 6% Polyacrylamide gel, or using an ABI3730 DNA Analyzer (Applied Biosystems, Foster City, CA, USA). Samples with the 25bp deletion were further confirmed by direct sequencing of amplicons, using the BigDye terminator kit (Applied Biosystems, Foster City, CA, USA) and analysed on an ABI3730 DNA Analyser<sup>8</sup>.

### Protein analysis

Myocardial biopsies, wherever possible, were obtained from the individuals with cardiac failure with their informed written consent and stored at -80°C. Tissue samples were transferred from -80°C directly to SDS-sample buffer with 6 M urea, preheated at 90°C, and homogenized. Insoluble material was pelleted and the supernatant analyzed on 14% SDS-polyacrylamide gels. For quantification, gels were stained with Coomassie brilliant blue and the actin band quantified densitometrically with a gel scanner. Samples were adjusted to equal protein concentrations by appropriate dilution in SDS-sample buffer. Equal volumes were then separated on 8–12% gradient gels and transferred to nitrocellulose membranes by electroblotting essentially as described<sup>9</sup>. Cardiac MyBP-C was detected using the rat polyclonal antibody directed against the recombinant NH<sub>2</sub>-terminal module of C0-C1 of human cardiac MyBP-C<sup>10</sup>. Bound antibody was visualized with anti-rat or rabbit horseradish peroxidase conjugate and the ECL-system following the instructions of the supplier (Amersham Life Science). Blots were exposed on X-AR5 film (Eastman Kodak Co., Rochester, NY) for 30 s to 20 minutes.

### Amplification of cDNA sequences

Total RNA was isolated from endomyocardial biopsies of the left ventricular myocardium according to the protocol described by RNeasy Minikit (Qiagen). A total of 100 ng RNA was reverse transcribed in a 20 µl volume as follows: 4 µl of reverse transcription buffer, 2 µl of 0.1 M DTT, 0.25 µl of RNA Guard, and 10 U H-Reverse Transcriptase Superscript from GIBCO BRL, Life Technologies (Eggenstein, Germany), 1 µl of 10 M pd (N<sub>6</sub>)-primer, and 1 µl of 1 mM dNTP from Pharmacia LKB Biotechnology were added to preheated (68°C, 5 minutes) RNA in a total volume of 20 µl. The reaction was incubated at 37°C for 1.0 hour and terminated by heat inactivation (95°C, 5 minutes). The cDNA products were then amplified in a 50 µl PCR reaction using the outer primer pair (Exon 32F: GCT ACA CTG CTA TGC TCT GCT GTG C and Exon 34R: CTG GCC ATC CCC AGG AGC CAG C). Blunt-ended PCR products were obtained using *Pfu* Turbo DNA polymerase (Stratagene) and were directly cloned into pCR-Blunt II-Topo vectors (Invitrogen) and sequenced.

### DNA Sequencing

Amplified PCR products, gel-isolated with a QiaxII Gel Extraction Kit (Qiagen). PCR-amplified cDNA, genomic DNA fragments, and plasmid DNA were sequenced on an ABI3730 DNA analyzer (Perkin-Elmer Corp., Applied Biosystems, Hitachi, Japan), using the ABI PRISM BigDye Terminator Cycle Sequencing Kit (Perkin-Elmer Corp., Foster City, CA), following the manufacturer's instructions.

### Generation of recombinant adenovirus expressing wild type and truncated cMyBP-Cs

Two different cDNAs encoding WT and mutant mouse cMyBP-Cs were used in this study, since cMyBP-C is highly conserved between the human and mouse genomes. The WT cMyBP-C encodes the full-length protein and the mutant cMyBP-C, which results from 25 bp deletion in the intron 32, leads to the skipping of exon 33 (Accession number NM\_008653). The procedure to construct the WT cDNAs was as described previously<sup>10</sup>. In the mutant

cMyBP-C, the exons 33 and 34 were completely removed, which altered the coding sequence for the region downstream of exon 32 and introduced a stop codon<sup>10</sup>. Replication-deficient recombinant adenoviruses were made by using the AdEasy system (Stratagene). The cells were normally transfected at a multiplicity of infection of ten. To distinguish the transgenic proteins from endogenous cMyBP-C protein, a myc epitope (EQKLISEEDL) was introduced after the initiation methionine codon of both the WT and mutant cDNAs.

### **Cardiomyocytes and Confocal analysis**

Rat neonatal cardiomyocytes were isolated according to the manufacturer's protocol (Worthington Neonatal Cardiomyocyte Isolation System, Lakewood, NJ). Localization of cMyBP-C to the sarcomere was determined by immunohistochemical analyses using confocal microscopy. Alexa Fluor 488-conjugated goat anti-rabbit and Alexa Fluor 568-conjugated rabbit anti-mouse antibodies and TO-PRO-3 for nuclear staining were from Molecular Probes (Invitrogen). Polyclonal antibody against cMyBP-C (C0-C1), monoclonal antibody against  $\alpha$ -tropomyosin (Sigma) and monoclonal antibody against the myc epitope (Roche) were utilized to immunostain neonatal cardiomyocytes. Cardiomyocytes were examined using confocal microscopy (Nikon PCM 2000) and software SimplePCI v.4 (C. Imaging Systems).

### **STR genotyping and calculation of variance**

Five STR markers which are known closer to the 25 bp deletion (~3.4 MB up and downstream region), flanking the *MYBPC3* gene were amplified using a fluorescently labeled forward primer (Supplementary Table 5). Amplicons were analysed using an ABI3730 DNA Analyzer. Haplotypes were inferred from the genotypes obtained using PHASE<sup>11</sup>. The variance of each STR on the 25bp deleted chromosomes and the wild type chromosomes were then calculated.

### **Allele-specific amplification and resequencing of *MYBPC3* deleted and non-deleted alleles**

We used allele-specific amplification to resequence ~10 kb haplotypes centered on the 25 bp deletion from nine heterozygous individuals (18 chromosomes). Long-range PCR was used to amplify the 25bp deleted and non-deleted alleles separately from heterozygous individuals, using a primer spanning or within the 25bp deleted region, respectively, paired with a second primer ~6.5 kb away (Supplementary Figure 7). A ~13 kb region of the *MYBPC3* gene surrounding the deletion was thus amplified in two fragments. The two amplicons from each chromosome were pooled and ~600 bp overlapping subfragments were amplified using 58 sets of primers (Supplementary Table 8 and 9). The amplicons were purified using SAP and ExoI (37°C for 15 minutes and 80°C for 15 minutes.) and sequenced using BigDye terminator cycle sequencing kit and ABI3730 DNA analyzer. SNPs found in a ~10 kb region of the 25 bp deleted and non-deleted chromosomes were flagged by Gap4 and checked manually in Mutation Surveyor. The two haplotypes from each individual were pooled and missing data (6.7%) were inferred by PHASE<sup>11</sup>. The haplotypes inferred by PHASE were checked for consistency with the directly-determined haplotypes. We found 24 variable sites, 23 SNPs and one insertion/deletion polymorphism (Supplementary Figure 7).

### **Estimation of the TMRCA of the deletion chromosomes**

Five haplotypes were found among the nine deletion chromosomes. Two had structures that could be accounted for by single recombination events between the deletion consensus haplotype and observed non-deleted haplotypes, and were therefore considered likely to have arisen by recombination rather than mutation. The other three haplotypes could not be related to observed haplotypes by a simple recombination pathway and were therefore considered likely to have arisen by mutation. The deletion haplotypes differed from the consensus deletion haplotype by a mean of 0.22 substitutions per ~10.3 kb. Since the human and

chimpanzee sequences from this region differed by 83 positions in the 9.8 kb for which sequence data were available, and half of these were likely to have accumulated on the human lineage since its split from the chimpanzee lineage ~6.5 million years ago, a TMRCA of the human deletion haplotypes was estimated at  $\sim 33 \pm 23$  thousand years using the  $\rho$  statistic<sup>12</sup>.

#### **4. Supplementary Note**

##### **Occurrence of the 25 bp deletion outside the Indian Subcontinent**

The absence of the deletion from most populations tested in Indonesia and from the indigenous Semang and Senoi of the Malay Peninsula suggests a relatively recent intrusion in Southeast Asia from South Asia. The “Indianization” of Southeast Asia probably did not involve settlement until the fifth century AD and was focused around the Strait of Malacca and the Java Sea<sup>13</sup>, so the arrival of the deletion (indicated by its presence in the Tenggerese of Java and Aboriginal Malays) is unlikely to date to before this time. Although there are few mtDNAs of Indian origin in Southeast Asia<sup>14, 15</sup>, Y chromosomes of Indian ancestry have been found at a frequency of ~12% in Bali, where Indian influence had the greatest impact, suggesting Indian male settlement at least here<sup>16</sup>. Its presence in the Aboriginal Malays may seem surprising, given their isolation from the Indianized medieval cultures of the Malay Peninsula. However, it can readily be explained by introduction from an already Indianized island Southeast Asia after the seventh century (to which Aboriginal Malays trace part of their ancestry, although the time depth remains controversial)<sup>14, 17</sup> or even to more recent gene flow with Indian plantation labourers.

## 5. Supplementary References

1. Ammash, N.M., Seward, J.B., Bailey, K.R., Edwards, W.D. & Tajik, A.J. Clinical profile and outcome of idiopathic restrictive cardiomyopathy. *Circulation*. **101**, 2490-2496 (2000).
2. Mestroni, L. *et al.* Guidelines for the study of familial dilated cardiomyopathies. Collaborative Research Group of the European Human and Capital Mobility Project on Familial Dilated Cardiomyopathy. *Eur. Heart. J.* **20**, 93-102 (1999)
3. Phadke, R.S., Vaideeswar, P., Mittal, B. & Deshpande, J. Hypertrophic cardiomyopathy: an autopsy analysis of 14 cases. *J Postgrad. Med.* **47**, 165-170 (2001).
4. The International HapMap Consortium. A second generation human haplotype map of over 3.1 million SNPs. *Nature* **449**, 851-61 (2007).
5. Price, A.L. *et al.* Principal components analysis corrects for stratification in genome-wide association studies. *Nat Genet* **38**, 904-9 (2006).
6. Patterson, N. *et al.* Population structure and eigenanalysis. *PLoS Genet* **2**, e190 (2006).
7. Cann, H.M. *et al.*, A human genome diversity cell line panel *Science*. **296**, 261-262 (2002).
8. Thangaraj, K. *et al.*, Genetic affinities of the Andaman Islanders, a vanishing human population. *Curr. Biol.* **13**, 86-93 (2003).
9. Towbin, H., Staehlin, T. & Gordon, J. Electrophoretic transfer of proteins from polyacrylamide gels to nitrocellulose sheets: procedure and some applications. *Proc. Natl. Acad. Sci.* **76**, 4350-4354 (1979).
10. Sadayappan, S. *et al.*, Cardiac myosin-binding protein-C phosphorylation and cardiac function *Circ. Res.* **25**, 1156-1163 (2005).
11. Stephens, M., Smith, N. J. & Donnelly, P. A new statistical method for haplotype reconstruction from population data. *Am. J. Hum. Genet.* **68**, 978-989 (2001).
12. Bandelt, H. J., Forster, P. & Röhl, A. Median-joining networks for inferring intraspecific phylogenies. *Mol. Biol. Evol.* **16**, 37-48 (1999).
13. Bellwood, P. *Prehistory of the Indo-Malaysian archipelago* (Univ. of Hawaii Press, Honolulu, 1997).
14. Hill, C. *et al.*, Phylogeography and ethnogenesis of aboriginal Southeast Asians *Mol. Biol. Evol.* **23**, 2480-2491 (2006).
15. Hill, C. *et al.*, A mitochondrial stratigraphy for island southeast Asia. *Am. J. Hum. Genet.* **80**, 29 (2007).
16. Karafet, T.M. *et al.*, Balinese Y-chromosome perspective on the peopling of Indonesia: genetic contributions from pre-neolithic hunter-gatherers, Austronesian farmers, and Indian traders. *Human Biology* **77**, 93-114 (2005).
17. Bellwood, P. *Asian Perspect.* **32**, 37 (1993).
